# Supplementary material
Source: publisher site journal article supplement (https://en-cdn.bio-protocol.org/attached/file/20210222/3957%20Supplementary%20file%20Figures%20S1%20S3.docx)
Supplement: Supplementary file 1 [file 3957%20Supplementary%20file%20Figures%20S1%20S3.docx]

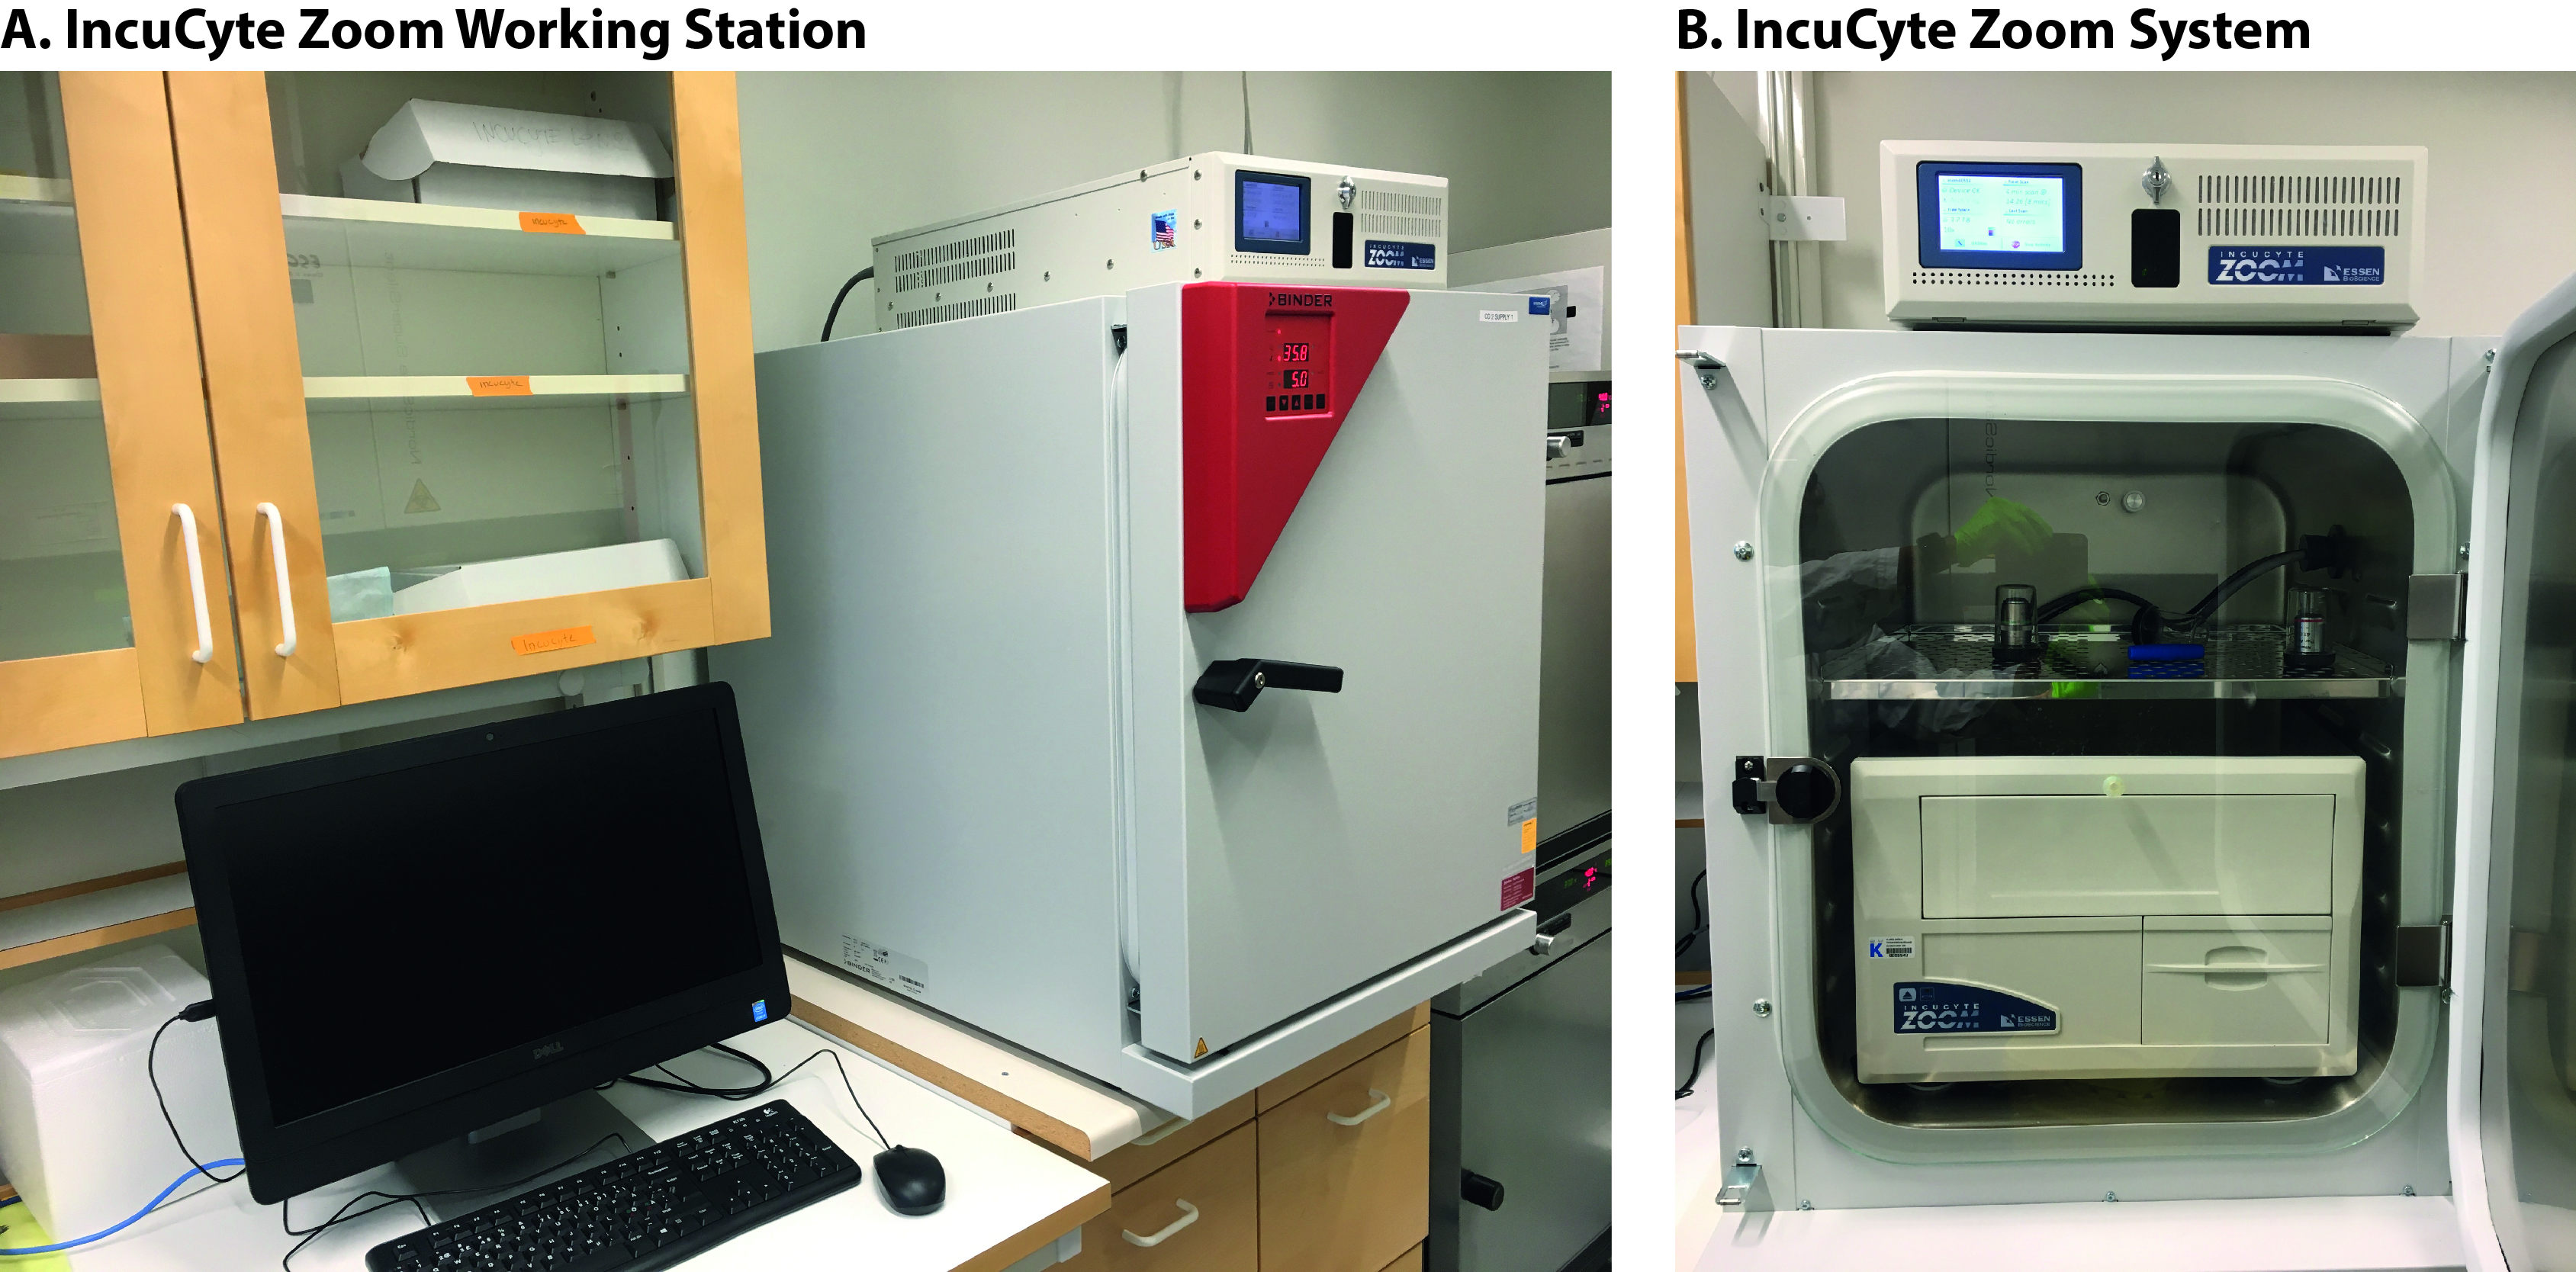


**Figure S1. An image of IncuCyte Zoom Working station and IncuCyte Zoom system.** A. IncuCyte Working Station consist of a computer, a incubator and incyCyte Zoom system. B. IncuCyte Zoom system.


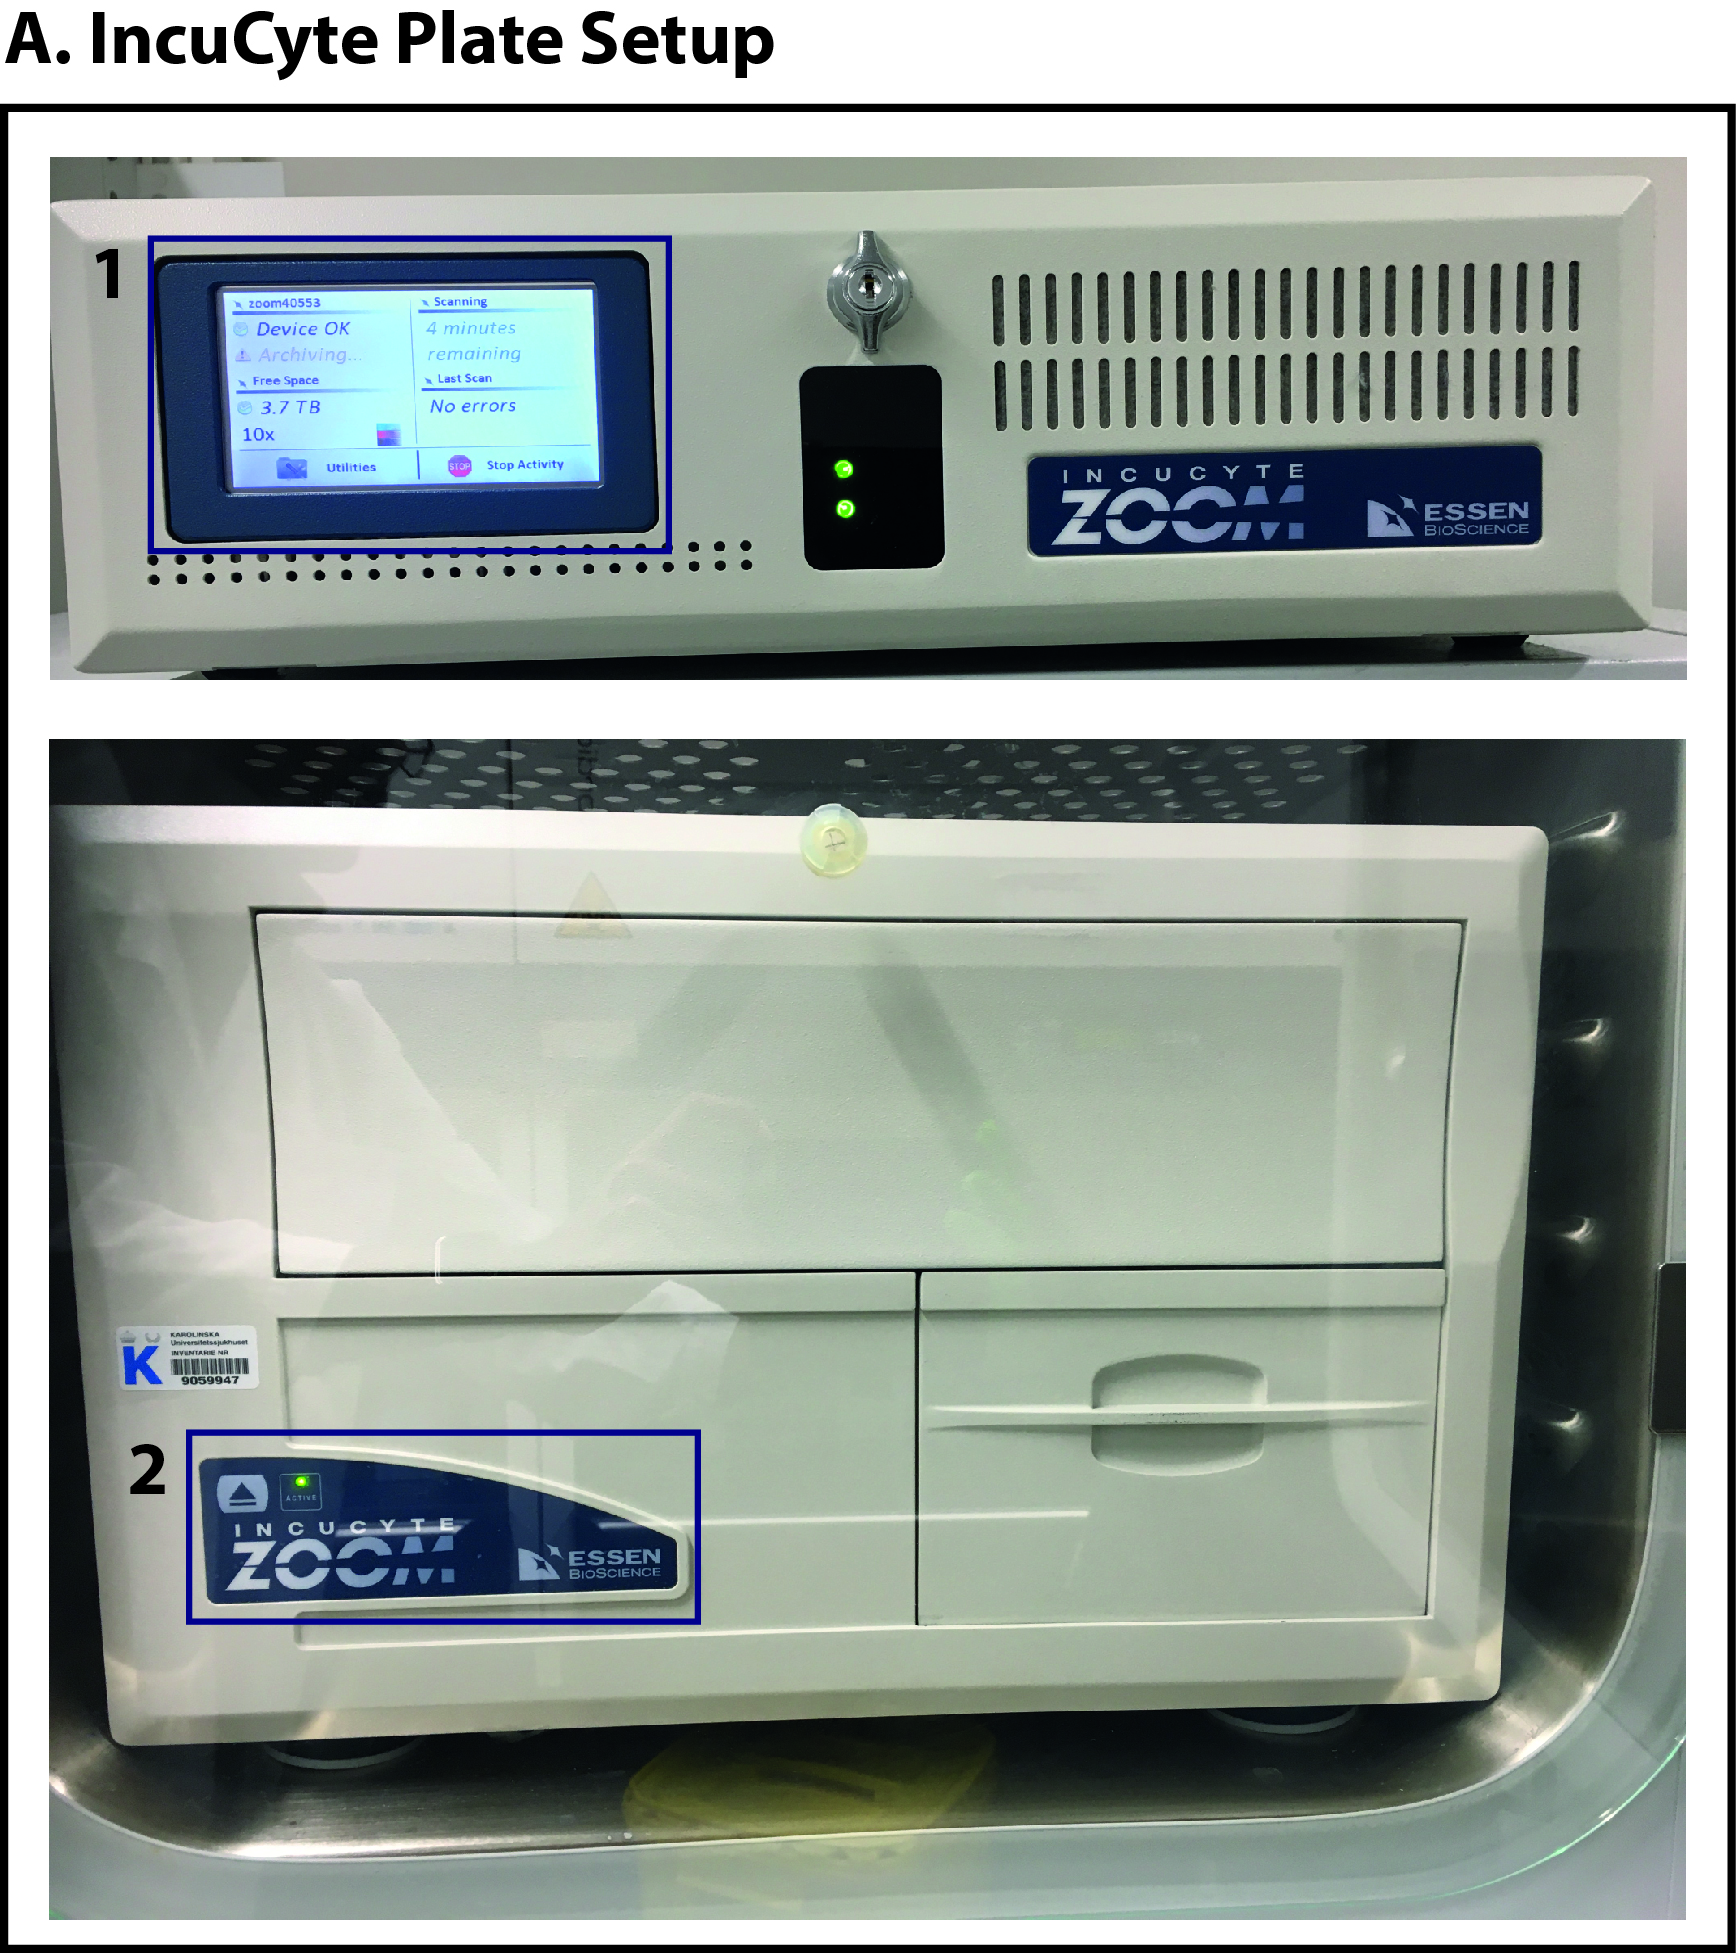


**Figure S2. An image of IncuCyte Zoom system.** A. It is important to check devise status before ejecting the drawer. When the active light is on (green) shown in 2 and scan is ongoing (shown in 1), it is not allowed to press eject button. Otherwise, the ongoing scan will be terminated.


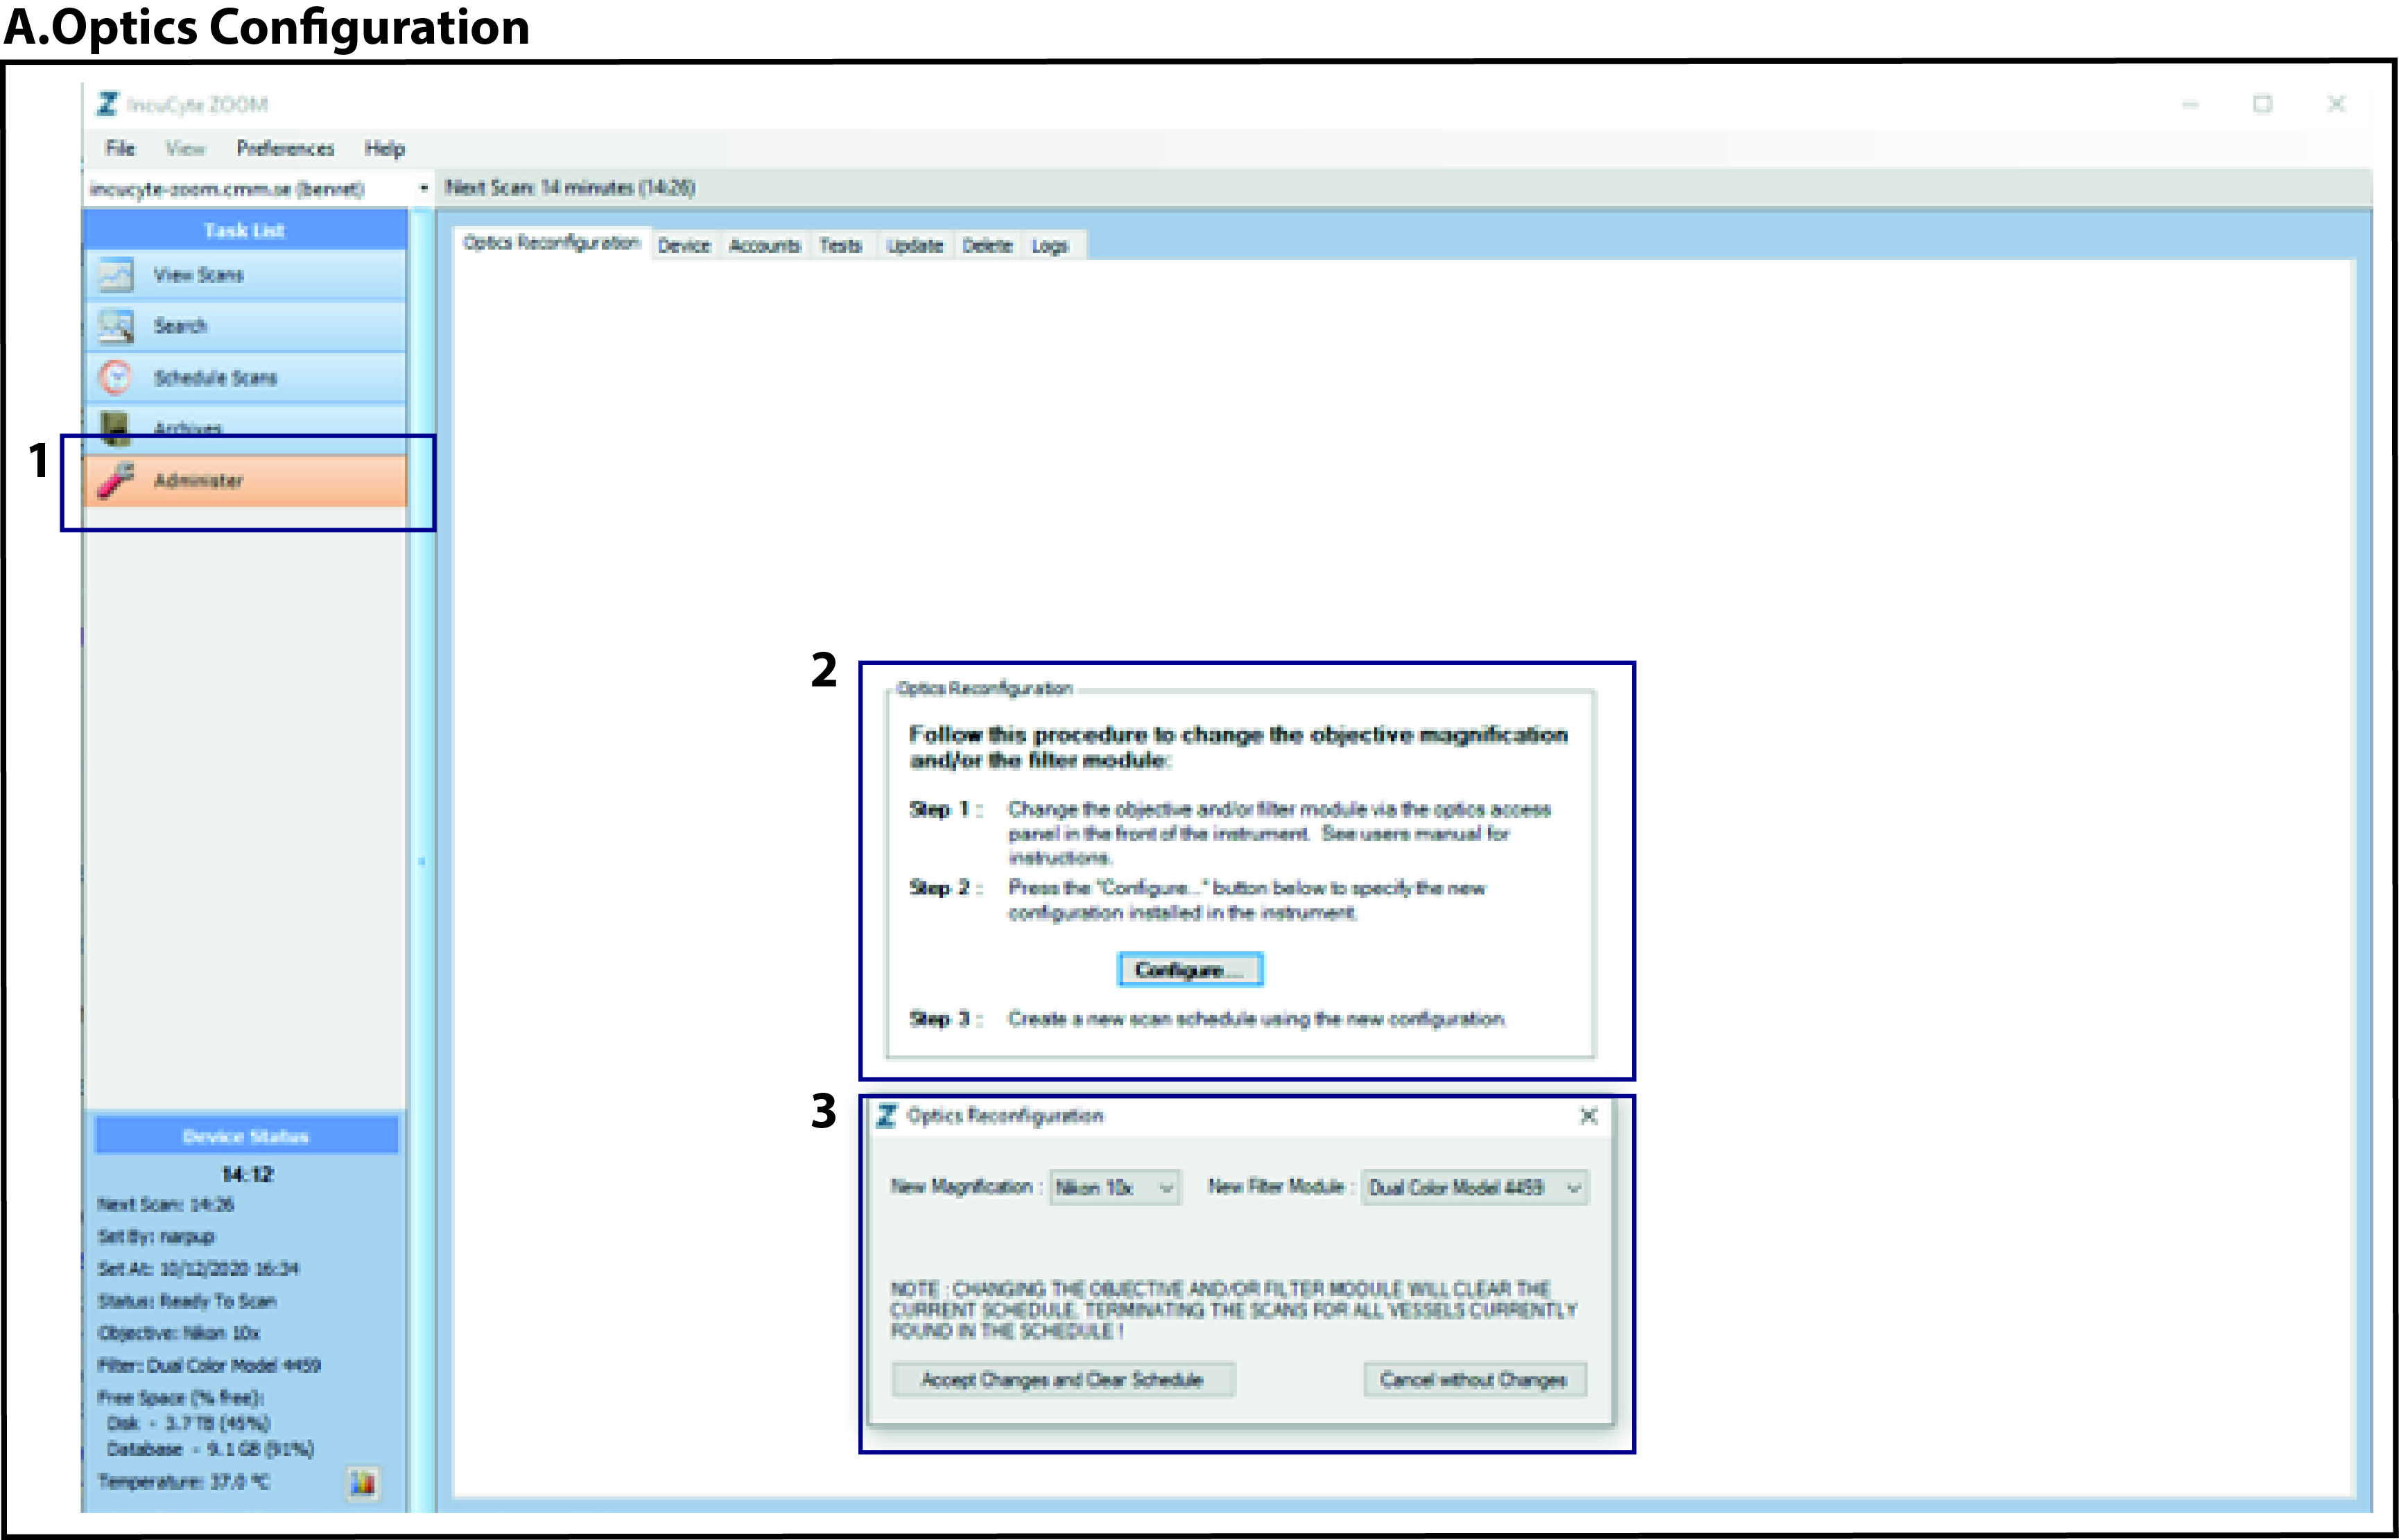


**Figure S3. An illustration of Optics Configuration.** A. Steps to change lens of IncuCyte Zoom.
